# Supplementary material
Source: Springer Nature journal article supplement (https://www.springermedizin.de/resource/supplementary/12943_2013_1358_MOESM1_ESM.pdf/9552796)
Supplement: MOESM1 [file 9552796]

| <b>Cell line</b> | <b>BRAF mutation</b> | <b>Cell line</b> | <b>RAS mutation</b>  |
|------------------|----------------------|------------------|----------------------|
| A375P            | V600E                | Skeml2           | KRAS Q61R            |
| WM164            | V600E                | D04              | NRAS Q61L            |
| D10              | V600E                | WM852            | NRAS Q61R            |
| Skmel28          | V600E                | MM415            | NRAS Q61L            |
| WM266.4          | V600D                | MM485            | NRAS Q61R            |
| WM9              | V600E                | MelJuso          | NRAS Q61L/ HRAS G13D |
| WM98.1           | V600E                | WM1361           | NRAS Q61K            |
| WM1158           | V600E                | CJM              | NRAS Q61K            |
| 501mel           | V600E                | WM1366           | NRAS Q61L            |

**Supplementary Table 1.** List of melanoma cell lines used in this study, grouped upon the presence of activating mutations in either BRAF or RAS.
